# Supplementary material
Source: publisher figshare collection journal article supplement (https://gsajournals.figshare.com/ndownloader/files/15132539)
Supplement: Supplementary file 1 [file 15132539]

## Sheet: clust
Genes in each cluster obtained with clust software. Values are log2 relative to DD.
C1 (34 genes)	C2 (198 genes)	C3 (118 genes)	C4 (13 genes)	C5 (11 genes)	C6 (12 genes)	C7 (36 genes)	C8 (91 genes)	C9 (46 genes)	C10 (12 genes)	C11 (15 genes)	C12 (11 genes)	C13 (22 genes)
MAC_00051	MAC_00046	MAC_00029	MAC_00405	MAC_00573	MAC_00301	MAC_00319	MAC_00086	MAC_00523	MAC_00489	MAC_00229	MAC_01348	MAC_00209
MAC_00252	MAC_00102	MAC_00058	MAC_02104	MAC_00779	MAC_01137	MAC_00510	MAC_00160	MAC_00584	MAC_01241	MAC_00230	MAC_01718	MAC_00228
MAC_00432	MAC_00130	MAC_00100	MAC_02640	MAC_01466	MAC_02084	MAC_00583	MAC_00215	MAC_00586	MAC_02245	MAC_00768	MAC_01868	MAC_00316
MAC_00437	MAC_00279	MAC_00101	MAC_03456	MAC_02062	MAC_02303	MAC_00863	MAC_00329	MAC_00984	MAC_02623	MAC_02021	MAC_03001	MAC_00873
MAC_00619	MAC_00289	MAC_00263	MAC_04245	MAC_02181	MAC_05266	MAC_01008	MAC_00563	MAC_01331	MAC_04442	MAC_02689	MAC_03310	MAC_01181
MAC_00829	MAC_00305	MAC_00297	MAC_05570	MAC_05756	MAC_06617	MAC_01687	MAC_00655	MAC_02138	MAC_07294	MAC_03377	MAC_04426	MAC_04410
MAC_00930	MAC_00306	MAC_00307	MAC_05681	MAC_06606	MAC_06985	MAC_02558	MAC_00680	MAC_02236	MAC_07297	MAC_03448	MAC_05522	MAC_06081
MAC_01054	MAC_00356	MAC_00379	MAC_05987	MAC_06698	MAC_06987	MAC_02714	MAC_00860	MAC_02237	MAC_08534	MAC_04894	MAC_06277	MAC_06234
MAC_01634	MAC_00387	MAC_00385	MAC_06372	MAC_07439	MAC_06989	MAC_02830	MAC_00865	MAC_02288	MAC_08803	MAC_05478	MAC_06280	MAC_07330
MAC_02595	MAC_00406	MAC_00390	MAC_07074	MAC_08359	MAC_08404	MAC_02972	MAC_00985	MAC_02289	MAC_09392	MAC_07255	MAC_07331	MAC_07602
MAC_02736	MAC_00433	MAC_00525	MAC_07745	MAC_08904	MAC_09082	MAC_02998	MAC_01023	MAC_02812	MAC_09688	MAC_08022	MAC_08508	MAC_07603
MAC_02781	MAC_00488	MAC_00554	MAC_07837		MAC_09811	MAC_03829	MAC_01027	MAC_02841	MAC_09766	MAC_08594		MAC_07604
MAC_03368	MAC_00536	MAC_00569	MAC_08097			MAC_04238	MAC_01102	MAC_03351		MAC_09015		MAC_07711
MAC_03676	MAC_00571	MAC_00621				MAC_04521	MAC_01533	MAC_03467		MAC_09102		MAC_08016
MAC_03688	MAC_00642	MAC_00677				MAC_04802	MAC_01570	MAC_03972		MAC_09782		MAC_08900
MAC_03698	MAC_00667	MAC_00839				MAC_04876	MAC_01730	MAC_03993				MAC_08901
MAC_03748	MAC_00718	MAC_01097				MAC_05179	MAC_01839	MAC_04005				MAC_08902
MAC_03855	MAC_00736	MAC_01108				MAC_05293	MAC_01886	MAC_04407				MAC_09145
MAC_04127	MAC_00808	MAC_01119				MAC_05546	MAC_01942	MAC_04408				MAC_09697
MAC_05073	MAC_00809	MAC_01227				MAC_05730	MAC_02044	MAC_04478				MAC_09698
MAC_05595	MAC_00838	MAC_01498				MAC_05797	MAC_02244	MAC_04755				MAC_09699
MAC_05625	MAC_01051	MAC_01653				MAC_05927	MAC_02352	MAC_04852				MAC_09701
MAC_05724	MAC_01062	MAC_01658				MAC_06246	MAC_02552	MAC_05027
MAC_05774	MAC_01086	MAC_01714				MAC_06513	MAC_02635	MAC_05170
MAC_06381	MAC_01087	MAC_01827				MAC_06686	MAC_02671	MAC_05441
MAC_06911	MAC_01098	MAC_02002				MAC_06712	MAC_02719	MAC_05660
MAC_07124	MAC_01336	MAC_02096				MAC_06814	MAC_02935	MAC_06077
MAC_07400	MAC_01368	MAC_02213				MAC_06881	MAC_03082	MAC_06160
MAC_08065	MAC_01472	MAC_02377				MAC_07096	MAC_03091	MAC_06218
MAC_08774	MAC_01496	MAC_02485				MAC_08055	MAC_03365	MAC_06363
MAC_09034	MAC_01557	MAC_02490				MAC_08112	MAC_03366	MAC_06713
MAC_09107	MAC_01586	MAC_02632				MAC_08142	MAC_03512	MAC_07031
MAC_09597	MAC_01594	MAC_02697				MAC_08882	MAC_03543	MAC_07107
MAC_09614	MAC_01612	MAC_02796				MAC_08897	MAC_03696	MAC_07243
	MAC_01613	MAC_02805				MAC_09130	MAC_03816	MAC_07381
	MAC_01622	MAC_02883				MAC_09367	MAC_03963	MAC_07811
	MAC_01716	MAC_02966					MAC_04008	MAC_08243
	MAC_01752	MAC_03457					MAC_04078	MAC_08641
	MAC_01833	MAC_03460					MAC_04175	MAC_08986
	MAC_01916	MAC_03465					MAC_04409	MAC_09221
	MAC_02332	MAC_03518					MAC_04439	MAC_09548
	MAC_02344	MAC_03558					MAC_04463	MAC_09549
	MAC_02351	MAC_03577					MAC_04480	MAC_09550
	MAC_02360	MAC_03687					MAC_04722	MAC_09551
	MAC_02361	MAC_03703					MAC_04895	MAC_09553
	MAC_02428	MAC_03718					MAC_05068	MAC_09639
	MAC_02429	MAC_03764					MAC_05363
	MAC_02486	MAC_03800					MAC_05364
	MAC_02556	MAC_03812					MAC_05591
	MAC_02580	MAC_03824					MAC_05611
	MAC_02700	MAC_03911					MAC_05619
	MAC_02703	MAC_04054					MAC_05677
	MAC_02908	MAC_04123					MAC_05731
	MAC_02925	MAC_04164					MAC_05748
	MAC_02927	MAC_04262					MAC_05827
	MAC_02928	MAC_04419					MAC_05872
	MAC_02945	MAC_04591					MAC_06150
	MAC_02946	MAC_04618					MAC_06154
	MAC_02953	MAC_04751					MAC_06159
	MAC_02992	MAC_04851					MAC_06361
	MAC_03098	MAC_04854					MAC_06414
	MAC_03123	MAC_04923					MAC_06640
	MAC_03173	MAC_04926					MAC_06690
	MAC_03312	MAC_05057					MAC_06704
	MAC_03378	MAC_05071					MAC_07018
	MAC_03384	MAC_05151					MAC_07078
	MAC_03503	MAC_05152					MAC_07303
	MAC_03578	MAC_05428					MAC_07313
	MAC_03674	MAC_05449					MAC_07403
	MAC_03844	MAC_05491					MAC_07706
	MAC_03854	MAC_05746					MAC_07712
	MAC_03874	MAC_05991					MAC_08118
	MAC_03878	MAC_06262					MAC_08121
	MAC_03898	MAC_06314					MAC_08150
	MAC_03902	MAC_06481					MAC_08276
	MAC_03971	MAC_06486					MAC_08317
	MAC_03988	MAC_06511					MAC_08353
	MAC_04074	MAC_06589					MAC_08436
	MAC_04075	MAC_06733					MAC_08447
	MAC_04134	MAC_06735					MAC_08590
	MAC_04137	MAC_06760					MAC_08765
	MAC_04216	MAC_06804					MAC_08903
	MAC_04217	MAC_06852					MAC_08931
	MAC_04229	MAC_06910					MAC_08985
	MAC_04234	MAC_06939					MAC_09108
	MAC_04263	MAC_06940					MAC_09111
	MAC_04264	MAC_06941					MAC_09249
	MAC_04332	MAC_06943					MAC_09355
	MAC_04377	MAC_06958					MAC_09552
	MAC_04468	MAC_07024					MAC_09712
	MAC_04523	MAC_07132					MAC_09784
	MAC_04529	MAC_07138
	MAC_04600	MAC_07161
	MAC_04659	MAC_07162
	MAC_04708	MAC_07202
	MAC_04714	MAC_07370
	MAC_04725	MAC_07377
	MAC_04763	MAC_07392
	MAC_04780	MAC_07452
	MAC_04789	MAC_07554
	MAC_04817	MAC_07626
	MAC_04870	MAC_08083
	MAC_04897	MAC_08103
	MAC_04910	MAC_08106
	MAC_04915	MAC_08357
	MAC_04917	MAC_08571
	MAC_04938	MAC_08685
	MAC_05020	MAC_08848
	MAC_05034	MAC_08868
	MAC_05069	MAC_08911
	MAC_05070	MAC_09143
	MAC_05077	MAC_09161
	MAC_05090	MAC_09283
	MAC_05091	MAC_09622
	MAC_05109	MAC_09781
	MAC_05145	MAC_09793
	MAC_05166	MAC_09800
	MAC_05167	MAC_09840
	MAC_05242
	MAC_05269
	MAC_05314
	MAC_05342
	MAC_05410
	MAC_05477
	MAC_05487
	MAC_05566
	MAC_05567
	MAC_05729
	MAC_05754
	MAC_05841
	MAC_05842
	MAC_05884
	MAC_05954
	MAC_06055
	MAC_06059
	MAC_06111
	MAC_06148
	MAC_06207
	MAC_06223
	MAC_06237
	MAC_06322
	MAC_06364
	MAC_06405
	MAC_06594
	MAC_06693
	MAC_06732
	MAC_06752
	MAC_06766
	MAC_06777
	MAC_06778
	MAC_06853
	MAC_06908
	MAC_06912
	MAC_07025
	MAC_07026
	MAC_07039
	MAC_07063
	MAC_07086
	MAC_07128
	MAC_07133
	MAC_07134
	MAC_07137
	MAC_07152
	MAC_07176
	MAC_07186
	MAC_07200
	MAC_07239
	MAC_07347
	MAC_07353
	MAC_07390
	MAC_07454
	MAC_07496
	MAC_07669
	MAC_07680
	MAC_07763
	MAC_07807
	MAC_07848
	MAC_07873
	MAC_08015
	MAC_08026
	MAC_08084
	MAC_08376
	MAC_08381
	MAC_08417
	MAC_08515
	MAC_08520
	MAC_08533
	MAC_08580
	MAC_08775
	MAC_08832
	MAC_09062
	MAC_09106
	MAC_09122
	MAC_09126
	MAC_09438
	MAC_09616
	MAC_09757
	MAC_09799

## Sheet: C1
C1 (34 genes)	NAME	5L0D_vs_DD	5L10D_vs_DD	5L25D_vs_DD	5L55D_vs_DD	5L115D_vs_DD
MAC_00051	Calcipressin family protein	2.02935	0.898364	0.197816	-0.13291	-0.147377
MAC_00252	Putative cyclin-supressing protein kinase	1.14995	0.660769	0.297894	0.00856673	-0.104042
MAC_00432	Zinc finger protein	1.40311	0.734939	0.0502047	0.0254668	-0.0427532
MAC_00437	Valyl-tRNA synthetase	1.95976	1.03276	0.229863	-0.027865	-0.112509
MAC_00619	VPS9 domain protein	1.42358	0.869972	0.433291	0.289986	0.13693
MAC_00829	Uncharacterized protein	1.18788	0.292512	0.252594	0.0104567	-0.0517215
MAC_00930	Uncharacterized protein	1.07444	0.478183	0.195429	0.0896441	0.116114
MAC_01054	C2 domain containing protein	1.31499	0.657956	0.158387	0.0728959	0.088737
MAC_01634	Uncharacterized protein	1.6645	0.249869	-0.324576	0.071316	-0.0644383
MAC_02595	Ornithine decarboxylase antizyme	1.13046	0.337622	-0.0250327	0.0580389	0.0591628
MAC_02736	Uncharacterized protein	1.61152	0.834683	-0.0608282	-0.14543	0.27486
MAC_02781	Uncharacterized protein	1.5797	0.181745	-0.816394	-0.201049	0.0817527
MAC_03368	Uncharacterized protein	1.4936	0.394776	-0.518853	-0.107242	0.00176116
MAC_03676	Uncharacterized protein	2.23335	0.285799	-0.943674	-0.13624	-0.390352
MAC_03688	Calponin	0.997241	0.441414	0.0447865	0.0521125	0.00287698
MAC_03698	DUF1183 domain protein	1.35915	0.683791	-0.283252	-0.372272	0.0249938
MAC_03748	DUF726 domain protein	1.19515	0.0814046	-0.424839	-0.266858	-0.0438925
MAC_03855	Uncharacterized protein	1.1009	0.234816	-0.293922	-0.134452	-0.152169
MAC_04127	Uncharacterized protein	1.10357	0.450696	0.097673	-0.0689691	0.150931
MAC_05073	Zinc-containing alcohol dehydrogenase superfamily protein	2.09002	1.02395	-0.319473	-0.0598252	0.103866
MAC_05595	Putative histidine kinase HHK2p	2.65851	1.07943	0.165201	0.260982	0.014944
MAC_05625	C6 transcription factor	1.43999	0.387668	0.341778	0.161498	0.127764
MAC_05724	Uncharacterized protein	1.90962	0.993734	-0.218825	0.147429	-0.169246
MAC_05774	Ribonuclease Z	1.29264	0.69984	0.0962967	-0.0170184	0.0722696
MAC_06381	Uncharacterized protein	1.1768	0.285534	-0.19041	0.108698	0.062715
MAC_06911	Arrestin	1.92895	0.836814	0.224485	-0.0667829	-0.00211854
MAC_07124	PAP2 domain containing protein	1.63126	0.771275	-0.251128	0.230526	0.177316
MAC_07400	Uncharacterized protein	1.52123	0.552845	-0.0936283	-0.330549	0.0500402
MAC_08065	Regulator of G-protein signaling	1.31062	0.533035	-0.433183	0.251076	-0.0331848
MAC_08774	Uncharacterized protein	1.7577	0.535622	0.117263	-0.316801	-0.33927
MAC_09034	Protein phosphatase regulatory subunit Gac1	1.50351	0.614775	0.144692	0.0661534	0.252573
MAC_09107	Palmitoyltransferase	1.62565	0.762863	0.230592	-0.00189642	-0.0428189
MAC_09597	Ubiquitin/metalloprotease fusion protein	1.29503	0.204525	-0.0514411	-0.0853117	-0.204493
MAC_09614	Uncharacterized protein	3.03437	1.26105	0.620783	0.154903	0.228764

## Sheet: C2
C2 (198 genes)	NAME	5L0D_vs_DD	5L10D_vs_DD	5L25D_vs_DD	5L55D_vs_DD	5L115D_vs_DD
MAC_00046	Putative 6-phosphofructo-2-kinase	1.58608	1.15649	0.451612	0.0105837	0.0852065
MAC_00102	Putative pyruvate decarboxylase	2.80593	3.21096	1.82509	0.140241	0.3272
MAC_00130	Uncharacterized protein	1.06608	0.768975	0.322779	0.0778707	-0.0630172
MAC_00279	Mannitol-1-phosphate 5-dehydrogenase	3.56476	2.79891	1.09303	0.0136288	0.021473
MAC_00289	DDHD domain-containing protein	1.21293	0.975439	0.117445	-0.0676335	-0.0441259
MAC_00305	MYND finger family protein	1.3382	1.20792	0.345134	0.141152	0.00697143
MAC_00306	CrcB-like protein	1.20154	1.20275	0.626794	0.0266002	0.190787
MAC_00356	Psi protein	1.83859	1.63612	0.480336	-0.0732778	0.166297
MAC_00387	Uncharacterized protein	0.935116	1.2237	0.572099	-0.087303	0.0535602
MAC_00406	DUF2347 superfamily protein	1.26958	1.92462	0.703741	-0.0612438	-0.0051142
MAC_00433	Uncharacterized protein	1.27478	1.27123	0.667476	0.221912	0.0960666
MAC_00488	Cystinosin	1.24166	1.3826	0.875168	0.344128	0.287543
MAC_00536	Uncharacterized protein	1.28344	1.46527	0.255685	-0.258102	0.313511
MAC_00571	Ubiquitin carboxyl-terminal hydrolase 12	1.25983	1.9296	0.5482	-0.578823	-0.23068
MAC_00642	Uncharacterized protein	1.05183	0.810655	0.28802	0.158215	-0.0487432
MAC_00667	Aspartate aminotransferase	1.10358	1.0115	0.332788	-0.508914	-0.392383
MAC_00718	Uncharacterized protein	1.06119	1.29148	0.520278	0.0448323	-0.17864
MAC_00736	DUF500 domain protein	0.934489	1.01627	0.472949	0.116391	0.039494
MAC_00808	Inositol 5-phosphatase, putative	1.21021	1.07376	0.404687	-0.000674349	-0.0135246
MAC_00809	Serine/threonine-protein kinase PRKX	1.04567	1.00579	0.377761	0.191041	-0.207439
MAC_00838	Uncharacterized protein	1.67697	1.97717	1.06283	0.543977	0.337721
MAC_01051	High mobility group protein	1.63847	1.77037	0.0592879	-0.237522	-0.196277
MAC_01062	PX domain protein	1.93738	2.29669	1.25464	0.129927	-0.125589
MAC_01086	Uncharacterized protein	1.51942	1.18634	0.252515	0.440698	0.41165
MAC_01087	LEM3/CDC50 family protein	1.43366	1.30431	0.0756448	-0.118732	0.0537769
MAC_01098	Putative BAR adaptor protein	1.75896	1.50722	0.743913	-0.0717307	-0.223813
MAC_01336	C6 zinc finger domain protein	1.45931	1.63287	0.695142	0.177823	0.178737
MAC_01368	Uncharacterized protein	1.18006	1.24134	0.473382	-0.152053	0.0491519
MAC_01472	Uncharacterized protein	1.94111	1.97907	0.690384	0.0489	0.168199
MAC_01496	Uncharacterized protein	1.29554	1.1207	0.566603	0.0369955	-0.0654649
MAC_01557	Ubiquitin fusion degradation protein (Ufd1), putative	1.33506	1.11232	-0.0229059	-0.188441	0.0598273
MAC_01586	Uncharacterized protein	1.71645	1.75096	0.595255	-0.394309	-0.0374634
MAC_01594	Sorting nexin mvp-1	0.728765	1.01976	0.171793	-0.152164	-0.059603
MAC_01612	Mucin, putative	0.951583	1.33703	0.448327	0.22729	0.168423
MAC_01613	Uncharacterized protein	2.06735	1.55478	0.771009	0.533955	0.0401945
MAC_01622	Arrestin domain containing protein	1.98084	1.93281	0.387883	0.197124	-0.0908634
MAC_01716	Uncharacterized protein	1.18009	0.993147	-0.0449116	-0.0868135	0.10571
MAC_01752	Uncharacterized protein	3.38353	3.65726	2.25436	1.18285	0.165507
MAC_01833	Uncharacterized protein	1.32343	0.99199	0.394961	0.172577	0.27565
MAC_01916	Frequency clock protein	3.29224	2.67253	1.38986	0.655113	0.609628
MAC_02332	Ankyrin repeat protein	1.44723	0.86187	0.392699	-0.0288775	0.0412861
MAC_02344	Thioredoxin reductase, putative	3.345	3.04602	1.36702	0.788114	0.206996
MAC_02351	Amine oxidase	1.29937	1.82475	0.63376	0.124765	-0.429949
MAC_02360	Glyoxalase/bleomycin resistance protein/dioxygenase	2.26422	1.65212	0.634884	0.437203	0.305759
MAC_02361	Uncharacterized protein	2.00717	1.74003	0.690277	-0.0044578	0.0569987
MAC_02428	Tyrosine/serine protein phosphatase, putative	2.50669	2.44946	1.13375	0.399379	0.134075
MAC_02429	Uncharacterized protein	2.40166	2.50657	-0.0759116	-0.444943	-0.257974
MAC_02486	Uncharacterized protein	3.82204	3.26249	0.950049	0.856354	-0.114242
MAC_02556	Uncharacterized protein	3.46127	3.48901	1.06683	0.357845	0.488392
MAC_02580	Uncharacterized protein	2.3573	2.26212	1.45069	0.701636	0.0337554
MAC_02700	Uncharacterized protein	0.978036	0.999076	0.378389	0.0872497	-0.0251543
MAC_02703	Uncharacterized protein	1.47069	1.35987	0.565093	0.601265	0.173296
MAC_02908	Leucine Rich Repeat domain protein	1.65071	1.51216	0.00839993	-0.138819	-0.642814
MAC_02925	Mitochondrial escape protein 2	0.946443	1.02451	0.388402	0.124607	-0.0911564
MAC_02927	Heat shock protein 70	1.08048	1.03874	0.259669	-0.258658	0.0565717
MAC_02928	Plasma membrane channel protein (Aqy1)	1.86929	1.87029	0.500429	0.158749	0.0043267
MAC_02945	Flavohemoprotein	3.11461	3.23593	1.70497	0.242551	0.69837
MAC_02946	Integral membrane protein	1.9166	2.45172	1.31078	0.119981	0.241703
MAC_02953	Cellobiose dehydrogenase	1.37116	1.25328	0.381733	0.085804	-0.018608
MAC_02992	Uncharacterized protein	2.45183	3.11946	0.800402	0.814655	0.170657
MAC_03098	Annexin	1.02361	0.901394	0.471649	-0.0330503	-0.00816672
MAC_03123	Uncharacterized protein	3.09263	2.06203	0.764864	0.0610436	-0.0791958
MAC_03173	PH domain protein	1.63201	1.19194	0.259373	-0.20066	0.0271672
MAC_03312	Uncharacterized protein	1.90089	1.16896	-0.11156	-0.288841	-0.0589328
MAC_03378	Uncharacterized protein	1.88586	1.08337	-0.195141	-0.0794862	-0.201004
MAC_03384	Potassium channel	0.92433	1.24685	0.598729	0.134597	0.0622587
MAC_03503	Transporter protein smf2	1.14649	1.31772	0.0448907	0.0162866	-0.137122
MAC_03578	Charged multivesicular body protein 3	1.01128	0.575779	0.138783	-0.130053	-0.363006
MAC_03674	Uncharacterized protein	1.60802	1.8845	0.040793	0.0898175	-0.0127885
MAC_03844	Putative bZip transcription factor	1.9926	1.32609	0.168926	0.0978979	-0.164541
MAC_03854	Uncharacterized protein	0.877641	0.998509	-0.0223845	0.141497	-0.134209
MAC_03874	Non-classical export protein Nce102, putative	2.53532	2.65864	1.42587	0.639812	0.194086
MAC_03878	Uncharacterized protein	2.8103	3.60945	1.34803	0.0728158	-0.499422
MAC_03898	C2 domain containing protein	1.06763	0.824614	0.375534	0.3985	0.263934
MAC_03902	DNA excision repair protein ERCC-8	1.3021	1.06892	0.438941	-0.0431055	-0.33286
MAC_03971	C2 domain containing protein	2.25681	2.18672	0.30177	0.14338	0.05212
MAC_03988	Uncharacterized protein	1.0349	1.04968	0.471551	0.0553744	-0.0426104
MAC_04074	AAA family ATPase, putative	2.86238	2.51496	0.399791	0.684539	0.190663
MAC_04075	Putative phospholipase	3.25262	2.77981	0.720652	0.721446	0.287228
MAC_04134	Uncharacterized protein	0.985857	1.08791	0.584624	-0.18067	0.222771
MAC_04137	Uncharacterized protein	0.95522	1.22393	0.221448	0.126299	0.0420381
MAC_04216	YT521-B-like splicing factor, putative	2.16044	2.13862	-0.442476	-0.288842	-0.162352
MAC_04217	Heat shock protein 30	4.80891	4.23669	2.54757	0.627704	0.62869
MAC_04229	Endopolyphosphatase	1.27575	1.12447	-0.104013	-0.10214	-0.272629
MAC_04234	Uncharacterized protein	2.19734	2.58959	1.18945	0.0934756	0.0474851
MAC_04263	Transcription regulator PAB1642, putative	1.84458	2.05653	0.775564	0.206519	0.151035
MAC_04264	Uncharacterized protein	3.05428	3.45744	1.71967	0.111187	-0.024067
MAC_04332	Uncharacterized protein	1.20158	1.47538	0.789159	0.287753	0.155896
MAC_04377	Uncharacterized protein	3.0683	2.82464	1.45317	0.894383	0.0624684
MAC_04468	MFS transporter	0.877578	1.08002	0.556158	0.224341	-0.0155269
MAC_04523	Patatin-like serine hydrolase	2.00717	1.36551	0.486985	-0.00552328	-0.058192
MAC_04529	GRAM domain-containing protein	1.16103	1.08738	0.334412	0.0489891	0.088435
MAC_04600	C2H2 type zinc finger domain-containing protein	1.66816	1.84676	0.96678	0.294454	-0.117527
MAC_04659	Phosphoketolase	2.94167	3.303	1.54076	-0.103149	-0.17201
MAC_04708	Metacaspase CasA	4.05982	4.00854	0.553185	0.146514	-0.224031
MAC_04714	PH domain protein	1.94675	1.75574	0.719386	0.146758	-0.0261696
MAC_04725	Phosphoenolpyruvate carboxykinase	3.00061	3.26365	1.67129	0.4135	0.276606
MAC_04763	Uncharacterized protein	2.28464	1.46211	0.732702	0.0881501	0.45171
MAC_04780	Uncharacterized protein	1.14893	0.928284	0.0989522	-0.0206105	0.0106055
MAC_04789	Phospho-2-dehydro-3-deoxyheptonate aldolase	0.815416	1.16777	0.313405	-0.376484	-0.321592
MAC_04817	Uncharacterized protein	2.37943	1.90192	0.968404	0.278248	0.0272911
MAC_04870	Cortical patch protein	1.25243	0.959663	0.683022	0.515721	0.152417
MAC_04897	Conserved glutamic acid rich protein	1.681	1.62792	0.484017	0.132292	0.110114
MAC_04910	Regulator of gluconeogenesis Rmd5, putative	1.13958	0.732061	0.26191	0.0163294	-0.0504504
MAC_04915	Mannan endo-1,6-alpha-mannosidase	1.80402	1.5142	0.33916	0.460344	-0.0211286
MAC_04917	Uncharacterized protein	1.62303	1.0779	0.280689	-0.128546	0.0354855
MAC_04938	Neutral amino acid permease, putative	1.39941	1.67082	0.385889	-0.0168395	0.143734
MAC_05020	Uncharacterized protein	1.33827	1.57802	0.254817	-0.0340461	-0.0376161
MAC_05034	Heat shock protein 101	3.3587	3.02607	1.28034	0.0774413	0.174307
MAC_05069	Acid phosphatase	1.30059	1.36608	0.293569	0.0343324	-0.0178017
MAC_05070	Uncharacterized protein	2.16142	1.91191	0.418167	0.240393	0.216298
MAC_05077	Cytochrome P450 monooxygenase	4.14554	3.7662	1.96424	0.625425	-0.31272
MAC_05090	High affinity methionine permease	1.58865	1.63677	0.313572	0.256596	0.219143
MAC_05091	Uncharacterized protein	2.42344	1.90346	0.601479	0.1663	0.147952
MAC_05109	Uncharacterized protein	0.999242	1.29273	0.311888	0.167116	0.226588
MAC_05145	Glycosyl hydrolase, family 18, putative	1.37018	1.74292	0.838217	0.139474	-0.100054
MAC_05166	Flavin-binding monooxygenase, putative	1.08795	0.683874	0.185897	0.150248	0.23025
MAC_05167	Cytochrome c biogenesis factor	1.22464	1.00913	0.0983106	-0.341104	0.174537
MAC_05242	Uncharacterized protein	2.09944	1.63949	0.266595	0.34947	0.169353
MAC_05269	Molybdenum cofactor sulfurase	1.99004	1.43181	0.195678	-0.21744	0.0633102
MAC_05314	Uncharacterized protein	1.23073	0.999957	0.372247	0.0821289	-0.0459663
MAC_05342	Alpha/beta hydrolase fold protein	1.18976	1.13254	0.042886	-0.260748	-0.247444
MAC_05410	Arrestin (Or S-antigen)	1.14802	1.08441	0.152667	-0.250537	-0.0962209
MAC_05477	Calcium/calmodulin-dependent protein kinase, putative	1.01371	0.872151	0.268734	-0.186026	-0.28774
MAC_05487	Uncharacterized protein	1.19761	0.758827	0.220958	-0.1555	-0.0118448
MAC_05566	Protein hob3	1.06479	0.847364	0.427366	-0.134996	-0.31693
MAC_05567	Uncharacterized protein	1.11111	0.947235	0.418881	0.212439	0.151693
MAC_05729	Uncharacterized protein	2.88735	2.96962	0.797927	0.081379	0.253259
MAC_05754	Fungal Zn binuclear cluster domain containing protein	1.85996	1.50705	-0.18808	-0.20312	0.122627
MAC_05841	Uncharacterized protein	2.12419	2.31989	1.02243	0.666285	0.727668
MAC_05842	Uncharacterized protein	2.21403	1.79785	0.529956	0.184058	-0.00328119
MAC_05884	Myb family transcription factor	1.04455	0.682152	0.241659	-0.194871	-0.0613093
MAC_05954	Putative syntaxin family member TLG1	1.12697	0.965662	0.19861	-0.0594593	0.0546909
MAC_06055	BZIP transcription factor (HapX), putative	0.831184	1.07608	0.445465	0.0834132	-0.0479699
MAC_06059	Uncharacterized protein	0.906559	1.0297	0.412407	0.0239935	-0.0488543
MAC_06111	Uncharacterized protein	1.26332	0.947651	0.513898	0.0981534	-0.105844
MAC_06148	Uncharacterized protein	1.76909	1.63418	0.777574	0.217649	0.0389334
MAC_06207	Uncharacterized protein	1.04614	0.928292	0.293632	0.0137413	-0.0750967
MAC_06223	Mitochondrial hypoxia responsive domain containing protein	1.00428	1.00639	0.0347382	-0.050659	-0.0582807
MAC_06237	RING-8 protein	0.930672	1.20937	0.312812	0.13717	0.249567
MAC_06322	Uncharacterized protein	0.982927	1.20989	0.420277	-0.0579024	0.0648129
MAC_06364	Heat shock protein 30	3.21255	3.16409	1.83746	0.613894	0.656461
MAC_06405	C-4 sterol methyl oxidase	1.00578	0.76905	0.255826	-0.164703	0.129618
MAC_06594	Putative transcription factor	1.46883	1.35188	0.278951	0.0315947	0.144037
MAC_06693	GMP synthase	1.23725	0.997945	-0.012824	-0.0550152	-0.0681236
MAC_06732	Hamartin	0.861642	1.12625	0.465849	-0.103496	0.122949
MAC_06752	Zn(II)2Cys6 transcription factor	1.29197	0.817932	-0.0146715	-0.101595	0.130781
MAC_06766	Guanine deaminase	1.13174	1.21182	0.672577	-0.228379	0.0261566
MAC_06777	Lipase, putative	2.2392	1.943	0.483874	0.253274	-0.0464941
MAC_06778	Aspartate-tRNA ligase	3.3757	3.04716	1.06614	0.32342	-0.15017
MAC_06853	Flavohemoglobin	1.75933	1.54124	0.346353	0.00517541	0.290852
MAC_06908	Sulfate transporter, putative	1.11611	1.13564	0.402361	0.0652433	-0.155664
MAC_06912	RTA1 domain protein, putative	1.89061	1.70132	0.475491	0.489163	0.156837
MAC_07025	Uncharacterized protein	1.50299	1.8329	0.648759	0.675409	0.149694
MAC_07026	NmrA family transcriptional regulator	2.17242	2.14297	0.675178	0.346631	-0.207927
MAC_07039	Uncharacterized protein	1.79844	2.46644	0.497124	0.0293944	-0.220289
MAC_07063	Uncharacterized protein	1.21449	0.919444	0.371184	0.407212	0.0361788
MAC_07086	Heat shock protein 78	2.55584	2.08521	1.07554	0.166412	0.257375
MAC_07128	Binuclear zinc transcription factor	1.30593	1.46648	0.134475	-0.2152	0.0519927
MAC_07133	Uncharacterized protein	2.09252	2.41239	0.796113	0.203115	0.292446
MAC_07134	C2H2 transcription factor (Egr2), putative	3.32972	2.44865	0.492219	0.515289	0.102616
MAC_07137	Uncharacterized protein	1.64832	1.51858	0.896262	0.237985	0.0171441
MAC_07152	Actin binding protein	1.33146	1.46694	0.587941	-0.160415	-0.154927
MAC_07176	Peroxisomal membrane protein Pex17	1.13454	1.04405	0.483404	-0.0230598	-0.184803
MAC_07186	Uncharacterized protein	3.33297	3.48663	1.89175	0.0312816	-0.33763
MAC_07200	Uncharacterized protein	1.39315	1.69504	0.786598	0.334666	0.135375
MAC_07239	Reductase	5.21066	6.5602	3.755	1.37356	0.474212
MAC_07347	Vacuolar protein sorting-associated protein vps13	1.49431	1.41394	0.532667	0.103982	-0.00305251
MAC_07353	Integral membrane protein	1.34776	1.46936	-0.0445207	0.00574459	-0.0434178
MAC_07390	Receptor-associated protein	1.19692	1.31733	0.694057	0.180195	0.0655852
MAC_07454	Oxysterol binding protein-like protein	1.67943	1.29199	0.592851	-0.103685	-0.199394
MAC_07496	Conserved fungal protein	0.849509	1.23964	0.0568003	-0.17659	0.0880259
MAC_07669	Uncharacterized protein	1.25216	1.14929	0.512385	-0.102844	-0.147562
MAC_07680	Phospholipase A2	2.62141	2.72893	1.44189	0.770205	0.157622
MAC_07763	Uncharacterized protein	1.84799	1.97387	1.09865	0.828931	0.115205
MAC_07807	Uncharacterized protein	1.49858	1.94021	0.700139	-0.635295	-0.461831
MAC_07848	Uncharacterized protein	1.21858	1.19178	0.538131	-0.014369	-0.180431
MAC_07873	Uncharacterized protein	2.34177	1.46201	0.210211	-0.098858	-0.0625065
MAC_08015	Uncharacterized protein	2.07964	1.85034	0.993905	0.370865	0.280172
MAC_08026	Uncharacterized protein	1.12768	1.06519	0.190826	-0.0262945	0.286952
MAC_08084	Mitogen-activated protein kinase	2.21928	2.56439	1.34113	-0.00538888	-0.176073
MAC_08376	Annexin ANXC4	0.915006	1.03812	0.0857552	-0.0406302	-0.0778424
MAC_08381	Uncharacterized protein	1.1204	1.04833	0.359193	-0.0225292	-0.209962
MAC_08417	Alpha/beta hydrolase, putative	1.22624	1.1011	0.451573	0.0407935	-0.00191159
MAC_08515	Uncharacterized protein	1.07169	0.971396	0.30084	0.0192099	-0.0891313
MAC_08520	Uncharacterized protein	3.14826	3.23095	0.182153	-0.227747	-0.534662
MAC_08533	Alpha-galactosidase	1.29722	0.940658	0.290971	0.0636911	0.152037
MAC_08580	FAD binding domain containing protein	1.03494	0.920992	0.0288262	-0.451066	-0.0635414
MAC_08775	Uncharacterized protein	1.59262	1.70221	0.41026	-0.21683	-0.0864843
MAC_08832	Uncharacterized protein	2.61742	2.3089	0.264126	-0.107395	-0.185585
MAC_09062	Allantoinase	1.47818	1.43706	0.577668	-0.424189	0.0160933
MAC_09106	Uncharacterized protein	1.35549	1.15806	-0.022051	0.188743	-0.100167
MAC_09122	26S proteasome regulatory subunit-like protein	6.70095	5.37977	2.89487	1.39732	0.765163
MAC_09126	DDHD domain protein	1.11089	1.00771	0.528289	0.181188	0.199465
MAC_09438	Putative rna-binding protein fus/tls	1.51391	1.38704	0.75372	-0.106359	-0.0592465
MAC_09616	Uncharacterized protein	1.08717	1.16023	0.661393	0.168361	0.103083
MAC_09757	Uncharacterized protein	1.96945	2.33157	1.34259	0.299041	0.348554
MAC_09799	Flavin-binding monooxygenase-like family protein	3.4857	3.41112	2.11228	1.12308	0.742617

## Sheet: C3
C3 (118 genes)	NAME	5L0D_vs_DD	5L10D_vs_DD	5L25D_vs_DD	5L55D_vs_DD	5L115D_vs_DD
MAC_00029	Ribitol kinase	2.00027	2.89098	1.86337	0.741983	0.143221
MAC_00058	1,3-beta-glucanosyltransferase	0.68818	1.15519	0.906377	0.456293	0.0208343
MAC_00100	Uroporphyrinogen-III synthase	0.81701	1.1242	0.944027	0.33945	0.139222
MAC_00101	Sulfhydryl oxidase	1.27025	1.61111	0.922051	0.189285	0.0569037
MAC_00263	Uncharacterized protein	6.96372	8.01226	7.17881	5.7807	2.95031
MAC_00297	Mercuric reductase, putative	0.844419	0.876518	0.998948	0.216726	0.166576
MAC_00307	Uracil phosphoribosyltransferase	0.694458	0.884994	1.03865	0.382025	-0.0311999
MAC_00379	Uncharacterized protein	1.23438	1.46561	1.00476	0.63442	0.304194
MAC_00385	DUF1295 domain-containing protein	1.9527	2.69383	2.21298	0.499557	0.0802224
MAC_00390	Uncharacterized protein	2.7907	3.10774	2.50249	1.61781	0.338107
MAC_00525	Uncharacterized protein	2.17406	2.64979	2.40084	1.65274	0.174177
MAC_00554	DNA repair family protein	1.10023	1.2003	1.04171	0.682735	0.368823
MAC_00569	Cystathionine beta-synthase, putative	0.798139	1.10554	0.830488	0.235851	-0.365476
MAC_00621	Aldo-keto reductase, putative	1.0791	1.21041	1.01187	0.468835	0.131503
MAC_00677	Uncharacterized protein	6.02552	5.52023	4.79047	3.86889	0.756827
MAC_00839	Uncharacterized protein	3.41362	3.69112	3.22186	2.73529	0.717954
MAC_01097	Mismatched base pair and cruciform DNA recognition protein, putative	5.30731	6.20484	5.14407	4.12495	1.3265
MAC_01108	Glutamine synthetase	1.56535	2.26971	1.43245	0.184967	-0.141489
MAC_01119	Uncharacterized protein	1.1928	0.99693	0.761609	0.432231	0.0196002
MAC_01227	Periplasmic nitrate reductase, putative	3.13925	4.00519	3.21887	2.12076	1.32863
MAC_01498	OefC	0.849992	1.73905	1.37638	0.137602	0.0599808
MAC_01653	Putative transcriptional regulator	0.890236	1.53624	0.961891	0.238322	0.0939841
MAC_01658	Uricase	2.09078	2.43838	1.78215	0.315342	0.190084
MAC_01714	Uncharacterized protein	4.18639	5.57148	4.54185	1.16571	0.0304793
MAC_01827	Meiotically up-regulated protein	3.90647	4.06019	3.96006	2.92119	1.17695
MAC_02002	GMC oxidoreductase	1.08768	1.32754	0.805654	0.263752	0.182561
MAC_02096	Uncharacterized protein	3.34969	3.76785	2.75511	1.3531	0.340672
MAC_02213	DUF500 domain protein	2.50249	2.64744	1.92842	0.745758	0.18153
MAC_02377	Uncharacterized protein	0.884812	1.03645	0.821754	0.713606	0.382402
MAC_02485	Lysozyme	2.75647	3.14395	2.49023	1.55727	0.127365
MAC_02490	Uncharacterized protein	1.83429	2.69979	1.7266	0.763686	0.205595
MAC_02632	Calcium/proton exchanger	1.02702	1.49856	0.853884	0.245661	0.196615
MAC_02697	3-ketoacyl-CoA thiolase	0.650853	1.11657	0.9503	0.551402	-0.035082
MAC_02796	Phosphate transport protein MIR1	1.34159	1.83666	1.19839	0.601464	-0.125245
MAC_02805	Putative 5-methyltetrahydropteroyltriglutamate-homocysteine S-methyltransferase	1.2779	1.59915	1.74001	0.577764	0.0627275
MAC_02883	Ankyrin	0.782804	1.4095	1.3251	0.191594	0.0777664
MAC_02966	Carboxypeptidase	1.7404	3.3991	2.62085	1.26866	0.45473
MAC_03457	Cellulose signaling associated protein ENVOY	3.75814	6.09738	6.60154	2.50558	0.921478
MAC_03460	PH domain protein	1.27977	1.30085	0.880512	0.425551	0.31542
MAC_03465	Proteasome regulatory particle, non-ATPase-like protein	0.706989	1.13238	1.09092	0.205572	0.0924069
MAC_03518	MFS toxin efflux pump (AflT)	1.46796	1.85913	1.19251	0.125588	0.0442964
MAC_03558	Alcohol dehydrogenase I	1.66027	2.66493	2.60116	1.11513	0.445527
MAC_03577	Uncharacterized protein	0.87134	1.30621	1.27134	0.395362	0.360632
MAC_03687	MYND domain protein, putative	1.81131	2.96555	2.22031	0.786062	0.378375
MAC_03703	Cryptochrome-2	4.0452	5.33979	5.35378	2.83999	0.996527
MAC_03718	NAD dependent epimerase/dehydratase family protein	0.896012	1.15529	0.986778	0.621799	0.243011
MAC_03764	2-heptaprenyl-1,4-naphthoquinone methyltransferase, putative	0.794539	1.31886	1.12925	0.571236	0.407547
MAC_03800	Sphingolipid long chain base-responsive protein PIL1	3.60157	4.1763	3.78712	2.76332	0.47511
MAC_03812	Thiol methyltransferase 1, putative	1.06647	1.11817	0.943827	0.252271	-0.134224
MAC_03824	Dienelactone hydrolase family protein	1.17047	1.71776	1.26313	0.398843	0.0267937
MAC_03911	AN1-type zinc finger protein	0.809952	1.239	0.756779	0.144275	-0.293547
MAC_04054	UPF0187 domain membrane protein	0.652066	1.12406	0.888236	0.136602	-0.0554458
MAC_04123	Uncharacterized protein	1.493	2.19027	1.44472	0.819118	-0.0278658
MAC_04164	Integral membrane protein	3.05916	3.12953	2.52486	1.84479	0.489256
MAC_04262	Thioredoxin reductase, putative	1.39066	2.33258	1.50232	0.255854	0.0660855
MAC_04419	Metacaspase CasA	0.852706	1.10065	0.837174	0.178517	-0.187282
MAC_04591	Putative diacylglycerol acyltransferase type 2a	0.966493	1.06522	0.748013	0.421387	0.367576
MAC_04618	Uncharacterized protein	1.14553	2.09408	1.96753	0.198128	0.0532204
MAC_04751	Vip1	1.66528	1.80385	1.60524	1.19099	0.562464
MAC_04851	Transaldolase	0.657716	1.06269	0.867553	0.323399	-0.2979
MAC_04854	Triacylglycerol lipase	0.97488	1.07559	0.702592	0.413932	0.0383918
MAC_04923	Uncharacterized protein	2.7017	2.32069	2.01872	1.3265	0.620985
MAC_04926	Mannan endo-1,6-alpha-mannosidase	0.69614	1.06036	0.812007	0.22454	0.128887
MAC_05057	Uncharacterized protein	0.921306	1.52656	1.08201	0.847558	-0.147627
MAC_05071	Uncharacterized protein	1.42221	2.897	2.00267	0.500362	0.550187
MAC_05151	Uncharacterized protein	1.04248	1.57055	1.08588	0.237781	0.200322
MAC_05152	Quinone oxidoreductase, putative	0.942661	1.79413	1.52007	0.732606	-0.0373904
MAC_05428	Uncharacterized protein	3.53622	4.54134	3.18468	1.8711	0.798002
MAC_05449	Epoxide hydrolase 1	1.05648	1.52797	1.30341	0.727033	0.00071402
MAC_05491	Photolyase	3.82136	4.96331	4.53725	2.28284	1.24218
MAC_05746	Uncharacterized protein	1.48047	1.36141	1.38293	0.536799	0.197916
MAC_05991	Plasma membrane proteolipid 3	1.29321	1.30258	0.845567	0.381877	-0.0825073
MAC_06262	Uncharacterized protein	0.964138	1.21777	1.09364	0.727028	0.283196
MAC_06314	DUF580 domain protein Pns1, putative	1.72917	1.76799	1.68235	0.846154	0.574904
MAC_06481	Uncharacterized protein	1.72696	2.28179	1.3841	0.554469	0.0830201
MAC_06486	Peroxisomal adenine nucleotide transporter 1	1.05454	1.12115	0.765233	0.540163	0.0967355
MAC_06511	Uncharacterized protein	1.32892	1.6859	1.13682	0.329015	-0.11079
MAC_06589	Putative DNA-binding protein	2.42854	3.64032	4.13141	2.25701	0.853379
MAC_06733	GPI-anchored cell wall beta-1,3-endoglucanase EglC	1.56458	2.00323	1.44962	0.616604	0.469295
MAC_06735	Arrestin	1.23388	1.48837	1.21675	0.759709	0.467274
MAC_06760	Ferrochelatase	1.873	2.65024	2.59073	1.04455	0.385708
MAC_06804	Formyltetrahydrofolate deformylase	0.769891	1.03659	0.751707	0.4185	0.0282687
MAC_06852	MFS transporter, putative	0.866394	1.1574	1.00683	0.327903	-0.0327588
MAC_06910	Triacylglycerol lipase, putative	2.49941	2.9848	2.11843	1.14518	0.273165
MAC_06939	Prenyl transferase	3.53847	6.65921	5.51644	2.17543	0.181052
MAC_06940	Uncharacterized protein	2.22687	4.48435	3.12479	0.650034	0.292565
MAC_06941	Geranylgeranyl diphosphate synthase	4.87181	7.69399	6.80326	2.67753	-0.725505
MAC_06943	p450 monooxygenase	2.54352	3.88714	2.90523	0.182168	-0.233437
MAC_06958	IQ calmodulin-binding motif protein	4.44707	5.38113	4.07931	2.8134	0.675635
MAC_07024	Eliciting plant response-like protein	1.98131	1.98325	1.59465	0.423602	0.342608
MAC_07132	Probable acetate kinase	0.968508	1.25253	0.795461	0.303754	0.297094
MAC_07138	Uncharacterized protein	2.31723	3.07306	2.64803	1.75078	0.435377
MAC_07161	Uncharacterized protein	1.07523	1.36907	0.946728	0.479805	-0.0267967
MAC_07162	Uncharacterized protein	4.37428	5.33515	4.00914	1.16304	0.409498
MAC_07202	Conserved fungal protein	1.56857	2.8533	1.79379	0.416446	0.125675
MAC_07370	Uncharacterized protein	2.24039	2.59245	2.10082	1.14841	0.183631
MAC_07377	MFS multidrug transporter, putative	2.74926	2.92447	1.92996	1.00582	0.476614
MAC_07392	Sphingolipid long chain base sensory protein, putative	2.19489	2.38165	1.69936	0.843816	-0.119624
MAC_07452	Uncharacterized protein	4.65524	4.50978	3.60732	1.44251	0.61858
MAC_07554	Heat shock protein 30	3.92163	4.71221	4.13647	2.45909	1.30958
MAC_07626	Uncharacterized protein	3.09831	3.46711	3.03713	1.52614	0.8908
MAC_08083	Alpha-1,4 glucan phosphorylase	3.29584	3.95701	3.1138	1.26604	0.356177
MAC_08103	Flavin prenyltransferase PAD1, mitochondrial	0.865575	1.70645	1.44834	0.800152	-0.245954
MAC_08106	Alcohol dehydrogenase, putative	1.1851	1.00133	0.932195	0.750445	0.0726333
MAC_08357	Uncharacterized protein	2.99288	4.1727	4.22892	1.64306	0.327173
MAC_08571	Glycogenin	0.935768	0.990202	1.03156	0.523567	0.00810899
MAC_08685	Flavin containing amine oxidase, putative	4.63994	6.18596	5.80073	3.16986	-0.40569
MAC_08848	Acetyltransferase	1.36405	2.12015	2.1313	1.27523	0.251405
MAC_08868	MFS transporter	3.6401	4.06722	2.60932	0.240255	-0.211787
MAC_08911	Uncharacterized protein	1.61435	1.72566	1.36206	0.606651	0.163203
MAC_09143	Putative trehalose-6-phosphate synthase/trehalose phosphatase	3.11407	3.13926	2.32328	1.44723	-0.0501166
MAC_09161	Acyl-CoA dehydrogenase	1.20431	1.94159	1.56471	1.08356	0.513244
MAC_09283	Uncharacterized protein	2.55563	2.49885	2.18233	1.26586	0.00419014
MAC_09622	DUF221 domain-containing protein	1.21924	1.13886	0.964703	0.369799	0.417096
MAC_09781	Translocator protein	1.31028	1.64589	1.45221	0.954905	0.106469
MAC_09793	Trehalose synthase	1.20434	2.35047	1.61188	0.444653	0.230292
MAC_09800	Uncharacterized protein	2.40268	2.60077	2.34526	1.46941	0.80797
MAC_09840	Membrane protein, putative	4.77232	6.05085	6.13003	3.33272	1.41518

## Sheet: C4
C4 (13 genes)	NAME	5L0D_vs_DD	5L10D_vs_DD	5L25D_vs_DD	5L55D_vs_DD	5L115D_vs_DD
MAC_00405	1-acyl-sn-glycerol-3-phosphate acyltransferase	1.14288	2.01053	0.91876	-0.294732	-0.260514
MAC_02104	Uncharacterized protein	0.31851	1.21732	1.19965	0.0447805	-0.255446
MAC_02640	Glycerol-3-phosphate O-acyltransferase	0.973313	1.83383	1.09181	-0.120338	-0.112011
MAC_03456	Uncharacterized protein	0.372219	1.38078	1.38759	-0.0628402	-0.00595264
MAC_04245	Uncharacterized protein	0.178381	1.10642	0.986669	-0.161443	0.228339
MAC_05570	Uncharacterized protein	0.303344	1.29046	1.03965	-0.175484	0.00405331
MAC_05681	C6 transcription factor, putative	0.694895	2.8185	1.93263	-0.0458489	0.0192626
MAC_05987	Uncharacterized protein	0.272344	1.28144	0.618968	-0.00842762	-0.132473
MAC_06372	Uncharacterized protein	0.98433	1.54329	0.777299	-0.185206	-0.0761941
MAC_07074	Uncharacterized protein	0.315328	1.03118	0.628893	-0.255312	-0.233768
MAC_07745	Uncharacterized protein	0.480709	1.29468	0.566855	-0.0198621	-0.0430654
MAC_07837	NRPS-like enzyme, putative	1.28551	3.00694	1.6448	-0.344519	-0.719549
MAC_08097	Endo-chitosanase	0.316307	1.36128	1.0005	-0.375912	-0.0218318

## Sheet: C5
C5 (11 genes)	NAME	5L0D_vs_DD	5L10D_vs_DD	5L25D_vs_DD	5L55D_vs_DD	5L115D_vs_DD
MAC_00573	Uncharacterized protein	0.12279	0.661238	1.18437	0.502765	0.0286949
MAC_00779	L-Rhamnonate Dehydratase	1.04532	2.15671	2.59756	1.20741	0.112758
MAC_01466	Vacuolar protease A	0.32008	0.696225	1.18624	0.547143	0.0303783
MAC_02062	Uncharacterized protein	0.715816	1.07337	1.3645	0.67102	0.180598
MAC_02181	Monooxygenase, putative	0.434717	1.32741	1.4964	0.691459	0.180257
MAC_05756	Putative zinc finger protein odd-paired-like (Opl)	0.677368	1.61684	1.86622	1.28623	0.49115
MAC_06606	GMC oxidoreductase, putative	0.710551	1.39927	2.34608	1.34312	0.197848
MAC_06698	Integral membrane protein	0.652363	1.86869	2.09563	0.945258	-0.115237
MAC_07439	p-hydroxylaminobenzoate lyase	0.694277	2.29621	2.59493	1.16665	0.203234
MAC_08359	Uncharacterized protein	0.388228	1.28766	1.50596	0.846172	0.289573
MAC_08904	Aspartic protease	1.54659	2.53064	2.98884	1.93253	0.172903

## Sheet: C6
C6 (12 genes)	NAME	5L0D_vs_DD	5L10D_vs_DD	5L25D_vs_DD	5L55D_vs_DD	5L115D_vs_DD
MAC_00301	C2 domain protein	2.35219	3.56248	4.90839	5.08289	2.22498
MAC_01137	Uncharacterized protein	1.24939	1.51123	2.41687	3.8957	1.93931
MAC_02084	Acid sphingomyelinase, putative	0.070656	0.82004	1.53718	1.43515	0.436816
MAC_02303	Protein bli-3	1.55117	2.80669	3.91796	4.1466	2.50675
MAC_05266	Uncharacterized protein	-0.153618	0.66473	1.53767	1.24557	0.753128
MAC_06617	L-xylulose reductase	0.721365	1.33941	1.54319	1.85744	0.662382
MAC_06985	Oxidoreductase	0.762787	1.32621	2.33743	2.78078	1.22134
MAC_06987	Ergot alkaloid biosynthetic protein B	0.197406	3.17695	4.72939	5.96828	1.67001
MAC_06989	Putative dimethyl-allyl-tryptophan-synthase	-0.0233496	3.3568	5.16126	6.40091	1.88258
MAC_08404	Secreted glucosidase, putative	0.313389	0.880839	1.61833	1.45529	0.660307
MAC_09082	Stress response protein (Ish1), putative	0.675138	1.18531	1.66297	1.56277	0.616815
MAC_09811	O-methyltransferase, putative	0.726551	2.19536	3.19192	2.65537	1.39064

## Sheet: C7
C7 (36 genes)	NAME	5L0D_vs_DD	5L10D_vs_DD	5L25D_vs_DD	5L55D_vs_DD	5L115D_vs_DD
MAC_00319	Uncharacterized protein	-1.42387	-1.08454	-0.461234	0.246397	-0.271867
MAC_00510	Uncharacterized protein	-2.49213	-1.89798	-0.349815	-0.218036	0.0421865
MAC_00583	Uncharacterized protein	-1.44822	-0.904243	-0.0643068	-0.276153	0.0334815
MAC_00863	C2H2 finger domain protein, putative	-2.1246	-1.05439	0.175438	-0.227635	0.0101354
MAC_01008	Cutinase G-box binding protein	-1.87539	-0.795647	-0.0262018	0.134172	0.0103907
MAC_01687	SprT family metallopeptidase, putative	-1.23746	-0.52444	0.107328	0.374123	0.0772011
MAC_02558	Uncharacterized protein	-1.43746	-0.875402	-0.306305	-0.483591	-0.302362
MAC_02714	Uncharacterized protein	-1.19408	-0.393035	0.097277	-0.104756	-0.0798973
MAC_02830	Serine/threonine protein kinase	-1.02423	-0.634248	0.0505185	0.269091	0.0535177
MAC_02972	Subtilisin-like protease	-1.21359	-0.806309	-0.147337	0.00365342	0.209758
MAC_02998	Uncharacterized protein	-1.6538	-1.32566	-0.548924	-0.11656	-0.133043
MAC_03829	APSES transcription factor	-1.68813	-0.806298	-0.120939	-0.275506	-0.0830214
MAC_04238	ThiJ/PfpI family protein	-1.36294	-0.910708	-0.219063	-0.192696	0.0155881
MAC_04521	Uncharacterized protein	-1.81656	-1.18239	0.131043	0.249654	0.099064
MAC_04802	Uncharacterized protein	-1.15567	-0.985442	-0.393891	0.00450979	0.196571
MAC_04876	Uncharacterized protein	-1.11522	-0.513817	-0.124114	0.0781381	0.253071
MAC_05179	GPR/FUN34 family protein	-1.33864	-0.935359	0.366428	0.366536	0.151524
MAC_05293	Uncharacterized protein	-1.22141	-0.586269	0.23541	0.191486	0.16373
MAC_05546	Beta-xylosidase, putative	-2.7989	-1.43442	-0.128691	0.223729	0.0685215
MAC_05730	60S ribosomal protein L19	-1.41897	-0.861986	-0.308216	0.138678	-0.16124
MAC_05797	Uncharacterized protein	-1.18418	-0.498368	-0.101961	0.072061	0.0351446
MAC_05927	Uncharacterized protein	-1.76201	-1.51669	-0.564682	-0.355001	0.239091
MAC_06246	Uncharacterized protein	-1.19406	-0.959742	-0.202495	-0.212832	0.0300639
MAC_06513	Uncharacterized protein	-1.17609	-0.79871	-0.0449069	-0.212659	0.184402
MAC_06686	Uncharacterized protein	-1.74289	-1.35853	-0.364962	-0.160403	-0.231891
MAC_06712	Uncharacterized protein	-1.18738	-0.454385	-0.0394373	-0.102134	0.075871
MAC_06814	Uncharacterized protein	-1.36683	-0.860735	-0.0124072	-0.108482	0.0338191
MAC_06881	Uncharacterized protein	-1.12727	-0.357836	-0.0108827	0.12201	0.0243012
MAC_07096	Uncharacterized protein	-1.1698	-0.77017	0.221926	0.0349021	0.150254
MAC_08055	C6 zinc finger domain protein	-1.01572	-0.481775	-0.163003	0.00255667	0.00947208
MAC_08112	Subtilisin-like serine protease	-1.87906	-1.52754	-0.347107	-0.53755	0.10703
MAC_08142	Uncharacterized protein	-1.46498	-0.619257	-0.0220252	-0.361863	-0.128707
MAC_08882	Pfs, NACHT and Ankyrin domain protein	-1.02501	-0.220608	0.268743	0.255666	0.131199
MAC_08897	Thioesterase family protein	-1.20176	-0.862379	-0.429949	-0.261564	0.128444
MAC_09130	Cation-transporting ATPase 4	-1.28981	-0.696725	-0.331813	-0.110578	-0.272459
MAC_09367	Uncharacterized protein	-1.46569	-1.09985	-0.0183597	0.310113	0.0482538

## Sheet: C8
C8 (91 genes)	NAME	5L0D_vs_DD	5L10D_vs_DD	5L25D_vs_DD	5L55D_vs_DD	5L115D_vs_DD
MAC_00086	Uncharacterized protein	-0.47737	-1.07558	-0.552378	-0.153246	0.101396
MAC_00160	Cell wall glycosyl hydrolase YteR, putative	-0.568954	-1.19303	-0.496528	0.152146	0.296636
MAC_00215	Carboxylic ester hydrolase	-1.19778	-2.16817	-0.527137	0.053558	-0.192406
MAC_00329	General amidase	-0.498226	-1.02794	-0.23166	0.00198028	0.124231
MAC_00563	Uncharacterized protein	-1.66474	-1.73741	-0.797498	0.0994009	0.0635645
MAC_00655	C6 zinc finger domain-containing protein	-0.663393	-1.28845	-0.188226	0.199487	0.300882
MAC_00680	SUN domain protein (Adg3), putative	-0.939902	-1.1893	-0.0896718	-0.161464	-0.0669474
MAC_00860	Tetraspanin	-0.838107	-1.557	-0.00251418	0.640438	0.168433
MAC_00865	Serine/threonine-protein kinase GIN4	-0.539476	-1.28854	-0.407055	0.136968	-0.172874
MAC_00985	Secreted aspartic proteinase	-1.13209	-1.82353	-0.821747	0.0933651	0.162643
MAC_01023	Uncharacterized protein	-1.00687	-1.18433	-0.208909	-0.33972	0.262504
MAC_01027	Uncharacterized protein	-0.674598	-1.42574	-0.669417	0.0328711	-0.0680423
MAC_01102	Uncharacterized protein	-0.416986	-1.06619	0.0485813	0.224721	0.00384923
MAC_01533	Uncharacterized protein	-1.20208	-1.21457	-0.15319	-0.02821	-0.103091
MAC_01570	Oxalate decarboxylase oxdC, putative	-0.945218	-1.40455	-0.670208	-0.183395	0.158792
MAC_01730	Sugar transporter, putative	-1.00881	-1.09169	-0.468972	-0.22044	-0.198641
MAC_01839	Uncharacterized protein	-1.00861	-0.90848	0.064444	-0.000739997	0.0966129
MAC_01886	Serine-rich protein	-0.77242	-1.66239	-0.408339	-0.189823	-0.114181
MAC_01942	Cytochrome P450 monooxygenase	-0.609855	-1.09841	-0.475692	0.319231	0.190865
MAC_02044	Uncharacterized protein	-1.45983	-1.86233	-0.29843	-0.112297	-0.0870911
MAC_02244	Uncharacterized protein	-1.2868	-1.50449	-0.0874218	-0.359413	0.0251204
MAC_02352	Myb family transcription factor	-0.866626	-1.34348	-0.29165	-0.089001	-0.108226
MAC_02552	Longevity-assurance family protein	-1.81578	-1.87222	-0.742403	-0.318407	-0.318124
MAC_02635	Uncharacterized protein	-1.03578	-1.11309	-0.426792	-0.153279	-0.225825
MAC_02671	Pheromone-regulated membrane protein	-0.449059	-1.10281	-0.176921	0.200458	0.0175578
MAC_02719	Transcription factor TamA	-0.989889	-1.77693	-0.864652	-0.526757	-0.337296
MAC_02935	Uncharacterized protein	-0.806979	-1.65913	-0.728039	-0.180973	-0.266963
MAC_03082	Uncharacterized protein	-1.47966	-1.48014	-0.561159	-0.0795823	0.049992
MAC_03091	Uncharacterized protein	-0.762753	-1.63808	-0.27092	0.0693847	0.165328
MAC_03365	Amino acid transporter, putative	-0.563637	-1.13595	-0.307837	0.385599	0.24989
MAC_03366	Uncharacterized protein	-0.712869	-1.32752	-0.504273	0.301871	0.0662703
MAC_03512	Uncharacterized protein	-0.873254	-1.42147	-0.716204	0.129474	-0.129875
MAC_03543	Uncharacterized protein	-0.941953	-1.24316	-0.465342	0.432016	0.297318
MAC_03696	C6 transcription factor, putative	-1.25429	-1.28709	-0.0654363	-0.248429	-0.0328813
MAC_03816	Ras-2 protein	-1.21823	-1.14126	0.0308596	0.163046	-0.00487634
MAC_03963	Multidrug resistant protein	-0.605225	-1.08167	-0.362762	0.00987553	0.102448
MAC_04008	Uncharacterized protein	-0.786754	-1.0191	-0.249907	-0.134819	0.0739178
MAC_04078	Uncharacterized protein	-0.952924	-1.60718	-0.0181904	0.217379	-0.0260776
MAC_04175	Uncharacterized protein	-0.770636	-1.05009	-0.485882	-0.216408	-0.230972
MAC_04409	Amino acid transporter arg-13	-1.4878	-1.65907	-0.409305	0.197224	0.098915
MAC_04439	Uncharacterized protein	-0.96437	-1.59497	-0.914113	-0.50166	-0.0919114
MAC_04463	Uncharacterized protein	-1.28857	-1.35364	-0.230958	0.0741485	0.163691
MAC_04480	Uncharacterized protein	-0.864504	-1.62604	-0.541982	0.422369	0.000227278
MAC_04722	Uncharacterized protein	-0.838947	-1.04191	-0.367645	-0.152956	-0.00464031
MAC_04895	Zinc transcription factor	-1.01754	-1.04303	-0.0362158	-0.00711914	0.130168
MAC_05068	Negative regulator of differentiation 1	-1.00364	-1.67498	-0.674475	-0.197045	-0.0509638
MAC_05363	Phosphotransferase enzyme family protein	-1.59295	-2.16884	-0.467939	-0.262679	-0.0501973
MAC_05364	Uncharacterized protein	-0.930564	-1.18867	-0.617106	-0.449245	-0.0694661
MAC_05591	Cytosolic hydroxymethyltransferase, putative	-0.930697	-1.19507	-0.0672349	-0.294584	-0.113905
MAC_05611	DENN domain-containing protein	-0.937064	-1.47913	-0.190646	0.0304021	0.00817007
MAC_05619	Phosphotransferase enzyme family protein	-0.583847	-1.12882	-0.511848	-0.0258906	-0.060334
MAC_05677	Uncharacterized protein	-0.850841	-1.31712	-0.638848	-0.283458	0.0303174
MAC_05731	Integral membrane protein, putative	-1.86273	-1.6274	-0.69535	-0.00386108	-0.221198
MAC_05748	Uncharacterized protein	-1.02118	-1.71915	-0.592402	0.445918	0.245219
MAC_05827	Integral membrane protein	-1.42989	-2.00416	-0.12821	-0.0583897	0.130776
MAC_05872	Uncharacterized protein	-0.893825	-1.26955	-0.299659	-0.123668	-0.311483
MAC_06150	Uncharacterized protein	-1.23556	-1.37065	-0.519445	-0.112329	-0.0679675
MAC_06154	Transcriptional regulatory protein pro-1	-0.733071	-1.27146	-0.00820866	-0.0515782	0.22855
MAC_06159	Uncharacterized protein	-0.804775	-1.1338	-0.336355	-0.175362	0.0669954
MAC_06361	Putative berberine bridge enzyme	-0.691616	-1.23226	-0.438546	0.0618325	0.240644
MAC_06414	SH3 domain containing protein	-0.673176	-1.36902	-0.120663	-0.0326752	-0.0679133
MAC_06640	Carbohydrate-binding protein	-0.587158	-1.62048	-0.507929	0.053741	0.583083
MAC_06690	Uncharacterized protein	-0.788521	-1.03114	-0.423	0.10456	0.262866
MAC_06704	Uncharacterized protein	-0.680858	-0.997949	-0.30554	0.0503779	0.312096
MAC_07018	Extracellular serine-rich protein	-0.930815	-1.85134	-0.414356	0.399724	-0.0993262
MAC_07078	Putative metalloregulatory protein	-1.13104	-1.4279	-0.354338	0.335607	0.195371
MAC_07303	Uncharacterized protein	-1.18893	-1.4762	-0.629216	-0.0415844	0.300187
MAC_07313	ATP-dependent bile acid permease	-0.821185	-1.10963	-0.0876288	0.171368	0.0122228
MAC_07403	Morphogenesis protein (Msb1), putative	-0.497108	-1.11382	-0.286995	-0.0377669	-0.150653
MAC_07706	Uncharacterized protein	-1.15733	-1.8357	-0.56499	-0.36319	-0.35493
MAC_07712	Uncharacterized protein	-1.31364	-1.99013	-0.709755	-0.0750007	0.664982
MAC_08118	Regulator of chromosome condensation family protein	-0.484565	-1.15214	-0.0721734	0.0957942	0.0482802
MAC_08121	C6 transcription factor, putative	-0.930238	-1.83082	-0.640633	0.0159458	0.5389
MAC_08150	AAA family ATPase, putative	-0.890088	-1.14902	-0.525746	-0.230113	0.141303
MAC_08276	Outer membrane autotransporter	-0.601843	-1.0355	-0.241358	0.00499595	0.344502
MAC_08317	Putative sialidase	-0.910982	-1.57496	-0.532085	0.0730001	0.149567
MAC_08353	Uncharacterized protein	-0.50909	-1.04021	-0.27158	0.00483723	-0.0657024
MAC_08436	Prp 4 CRoW domain-containing protein	-0.759784	-1.68037	-0.661649	-0.283301	0.0827031
MAC_08447	Uncharacterized protein	-0.950442	-2.07947	-0.136405	0.019337	-0.0763639
MAC_08590	G-protein coupled receptor	-1.52046	-1.58412	-0.135727	-0.229277	0.012675
MAC_08765	Pheromone-regulated multispanning membrane protein Prm1, putative	-0.976573	-1.57514	-0.64291	-0.178009	-0.00361726
MAC_08903	MFS transporter, putative	-1.51675	-1.82971	-0.547867	-0.255701	0.510649
MAC_08931	Transcription factor atf21	-0.885022	-1.05114	0.0811903	-0.204535	0.271686
MAC_08985	Squalene synthase	-0.861198	-1.16128	-0.352703	-0.195067	-0.0400778
MAC_09108	Uncharacterized protein	-1.09791	-1.20032	-0.543098	-0.425944	-0.0601364
MAC_09111	Glucooligosaccharide oxidase	-0.885432	-1.77895	0.0690564	0.381577	0.584273
MAC_09249	Endo-1,3(4)-beta-glucanase, putative	-2.1791	-2.44809	-0.850936	-0.120764	-0.569122
MAC_09355	BAR domain containing protein	-0.791862	-1.46296	-0.241481	0.0307184	0.107114
MAC_09552	Choline transport protein	-1.52564	-2.85099	-0.813508	0.229229	0.513145
MAC_09712	CAMK family protein kinase	-0.938384	-1.0324	-0.148446	-0.076912	-0.0625914
MAC_09784	GNAT family acetyltransferase, putative	-1.32494	-1.88585	-0.679139	-0.305086	-0.471361

## Sheet: C9
C9 (46 genes)	NAME	5L0D_vs_DD	5L10D_vs_DD	5L25D_vs_DD	5L55D_vs_DD	5L115D_vs_DD
MAC_00523	WSC domain containing protein	-0.521019	-1.31337	-1.23703	-0.0239826	0.100634
MAC_00584	Uncharacterized protein	-1.29164	-2.37552	-1.70279	-0.915084	-0.451021
MAC_00586	HET-s/LopB domain protein	-0.71864	-1.72174	-1.13963	-0.735623	-0.424609
MAC_00984	Uncharacterized protein	-1.38006	-2.03706	-1.54645	-0.507863	0.193182
MAC_01331	Uncharacterized protein	-0.464288	-0.976752	-1.18273	-0.431559	0.179943
MAC_02138	Salicylate hydroxylase	-0.572007	-1.11577	-0.845896	-0.0264392	-0.121288
MAC_02236	Integral membrane protein	-1.2726	-2.05167	-1.80603	-0.850347	-0.314261
MAC_02237	Capsule polysaccharide biosynthesis protein	-0.626551	-1.23058	-1.15465	-0.59607	-0.253113
MAC_02288	AAA family ATPase, putative	-0.697716	-1.23269	-0.896669	-0.238712	0.14411
MAC_02289	Low affinity iron transporter, putative	-0.857189	-1.38674	-1.21013	-0.373242	0.203257
MAC_02812	60S ribosome biogenesis protein Mak11, putative	-0.844109	-1.27204	-1.01349	-0.0133333	-0.00569507
MAC_02841	ADP-ribosylation factor	-0.563033	-1.41849	-0.875242	-0.16083	-0.105444
MAC_03351	Importin beta-4 subunit, putative	-0.700059	-1.26763	-1.06943	-0.246448	-0.350291
MAC_03467	Uncharacterized protein	-1.12925	-2.45771	-1.69308	0.160334	0.173902
MAC_03972	Alkaline phosphatase, putative	-0.540955	-1.08601	-0.878893	-0.329439	-0.305584
MAC_03993	Uncharacterized protein	-0.60389	-1.05092	-1.15448	-0.0913306	-0.0738543
MAC_04005	Uncharacterized protein	-0.9827	-1.31834	-1.19377	-0.259004	0.0795362
MAC_04407	Cytochrome P450 family protein	-0.767906	-1.84969	-1.15668	0.229227	0.490872
MAC_04408	ABC transporter	-0.776631	-1.73549	-0.903399	0.166196	0.22498
MAC_04478	WD domain-containing protein	-0.850384	-1.61704	-1.28542	-0.629544	-0.32813
MAC_04755	Homocitrate synthase	-0.820943	-1.5971	-1.46557	-0.622862	-0.0499649
MAC_04852	Ser/Thr protein phosphatase family	-0.563713	-1.22624	-1.52438	-0.391365	-0.290305
MAC_05027	Uncharacterized protein	-0.584867	-0.856803	-1.05751	-0.461653	-0.0997834
MAC_05170	Acetyltransferase, GNAT family	-0.946478	-1.30462	-1.58781	-0.819421	-0.0753322
MAC_05441	Uncharacterized protein	-0.949149	-1.28566	-1.4336	-0.458497	-0.464811
MAC_05660	RNA polymerase Rpb1 repeat domain protein	-0.591679	-1.32773	-1.19174	-0.383785	-0.262789
MAC_06077	Aromatic prenyl transferase	-0.569031	-1.8039	-1.02597	-0.438411	0.0899285
MAC_06160	Uncharacterized protein	-1.27977	-1.74942	-1.45548	-0.297104	-0.271023
MAC_06218	Methyltransferase LaeA	-0.739131	-1.38721	-0.950311	-0.619624	0.0965879
MAC_06363	Cyclin-dependent protein kinase complex component (Pcl8), putative	-0.795576	-1.29991	-1.36155	-0.54907	-0.150356
MAC_06713	Uncharacterized protein	-0.525407	-1.39712	-1.37886	-0.561834	-0.194688
MAC_07031	Zinc transporter protein	-0.797614	-2.04514	-1.44511	0.0164895	0.598129
MAC_07107	Cutinase negative acting protein	-0.484193	-1.04778	-1.28421	-0.174524	-0.0587926
MAC_07243	CDP-diacylglycerol--inositol 3-phosphatidyltransferase, putative	-0.64906	-1.06841	-0.808633	-0.102964	-0.0919137
MAC_07381	Gamma-glutamyltranspeptidase	-0.764423	-1.22265	-1.20526	-0.0886576	0.22375
MAC_07811	DNA-directed RNA polymerase subunit beta	-0.370022	-0.875498	-1.00723	-0.010958	-0.0733465
MAC_08243	Putative histidine kinase M232p	-0.438544	-0.781018	-1.05262	-0.235139	-0.0505703
MAC_08641	Uncharacterized protein	-0.714968	-1.07435	-0.863423	-0.172592	-0.0916904
MAC_08986	Metabolite transport protein, putative	-0.540831	-0.995845	-0.625319	-0.302676	-0.0967694
MAC_09221	Neutral ceramidase	-0.585622	-1.10198	-0.810409	-0.362933	-0.25252
MAC_09548	Phytanoyl-CoA dioxygenase	-0.459575	-1.70576	-1.68061	-0.247205	0.290997
MAC_09549	Polyketide synthase	-0.818753	-3.02337	-2.15512	0.0466034	0.463947
MAC_09550	Uncharacterized protein	-0.522604	-1.53515	-1.76546	-0.54243	-0.0641963
MAC_09551	NmrA family transcriptional regulator	-0.4465	-1.54375	-1.86837	-0.444597	-0.156715
MAC_09553	Phytanoyl-CoA dioxygenase	-0.341401	-1.23238	-1.45229	-0.238322	0.211841
MAC_09639	DUF803 domain membrane protein	-0.723603	-1.27124	-1.03673	-0.215603	-0.0944266

[truncated: 4 more sheets: C10, C11, C12, C13]
